# Supplementary material for: The BRCA1 Ashkenazi founder mutations occur on common haplotypes and are not highly correlated with anonymous single nucleotide polymorphisms likely to be used in genome-wide case-control association studies
Source: PubMed Central journal article supplement (PMC2093936; doi:10.1186/1471-2156-8-68), 2007-10-04
Supplement: 1471-2156-8-68-S1.pdf [file 1471-2156-8-68-S1.pdf]

## Summary of F-Statistics and heterozygosity for all loci

| rs number       | SNP number | F <sub>ST</sub> | Het <sup>a</sup> |
|-----------------|------------|-----------------|------------------|
| 13119           | 1          | 0.042           | 0.460            |
| 748620          | 2          | 0.027           | 0.471            |
| 17599948        | 3          | 0.060           | 0.283            |
| 11653231        | 4          | 0.027           | 0.477            |
| 9908805         | 5          | 0.302           | 0.083            |
| 2175957         | 6          | 0.023           | 0.484            |
| 3092986         | 7          | 0.014           | 0.060            |
| 8176072         | 8          | 0.005           | 0.004            |
| 8176074         | 9          | 0.008           | 0.004            |
| 3765640         | 10         | 0.027           | 0.480            |
| NA <sup>b</sup> | 11         | 0.005           | 0.004            |
| 8176090         | 12         | 0.069           | 0.028            |
| 1800062         | 13         | 0.017           | 0.007            |
| 8176101         | 14         | 0.017           | 0.007            |
| 8176103         | 15         | 0.030           | 0.489            |
| 8176104         | 16         | 0.013           | 0.031            |
| 8176109         | 17         | 0.028           | 0.488            |
| 8065872         | 18         | 0.100           | 0.049            |
| 8176120         | 19         | 0.025           | 0.474            |
| 799914          | 20         | 0.111           | 0.045            |
| 799913          | 21         | 0.234           | 0.120            |
| 8176128         | 22         | 0.051           | 0.021            |
| 8176133         | 23         | 0.046           | 0.452            |
| 799912          | 24         | 0.135           | 0.462            |
| 799923          | 25         | 0.114           | 0.257            |
| 8176145         | 26         | 0.024           | 0.507            |
| 8176146         | 27         | 0.018           | 0.021            |
| 7503154         | 28         | 0.030           | 0.470            |
| 1799950         | 29         | 0.023           | 0.076            |
| 4986850         | 30         | 0.054           | 0.102            |
| 16940           | 31         | 0.040           | 0.460            |
| 799917          | 32         | 0.141           | 0.450            |
| 4986852         | 33         | 0.019           | 0.028            |
| 2227945         | 34         | 0.033           | 0.021            |
| 16942           | 35         | 0.023           | 0.470            |
| 799916          | 36         | 0.069           | 0.488            |
| 2070833         | 37         | 0.137           | 0.105            |
| 2070834         | 38         | 0.021           | 0.467            |
| 8176158         | 39         | 0.043           | 0.461            |
| 8176160         | 40         | 0.026           | 0.481            |
| 8176166         | 41         | 0.050           | 0.283            |
| 8176174         | 42         | 0.051           | 0.021            |
| 3950989         | 43         | 0.027           | 0.477            |
| 8176175         | 44         | 0.053           | 0.028            |
| 8176177         | 45         | 0.017           | 0.007            |
| 8176178         | 46         | 0.034           | 0.014            |
| 1060915         | 47         | 0.041           | 0.475            |
| 3737559         | 48         | 0.029           | 0.122            |
| 8176187         | 49         | 0.008           | 0.004            |
| 8176188         | 50         | 0.051           | 0.021            |
| 6416927         | 51         | 0.068           | 0.021            |
| 8176198         | 52         | 0.041           | 0.461            |
| 8176199         | 53         | 0.049           | 0.336            |
| 4239147         | 54         | 0.077           | 0.493            |
| 8176206         | 55         | 0.033           | 0.021            |
| 2236762         | 56         | 0.068           | 0.483            |
| 1799966         | 57         | 0.031           | 0.488            |
| 3092987         | 58         | 0.044           | 0.458            |
| 8176225         | 59         | 0.025           | 0.010            |
| 8176232         | 60         | 0.010           | 0.005            |
| 8176234         | 61         | 0.026           | 0.488            |
| 8176235         | 62         | 0.043           | 0.415            |
| 8176236         | 63         | 0.288           | 0.087            |

|          |     |       |       |
|----------|-----|-------|-------|
| 8176240  | 64  | 0.051 | 0.021 |
| 8176242  | 65  | 0.046 | 0.456 |
| 8176245  | 66  | 0.051 | 0.021 |
| 3092994  | 67  | 0.027 | 0.472 |
| 8176259  | 68  | 0.042 | 0.017 |
| 8176265  | 69  | 0.039 | 0.446 |
| 2187603  | 70  | 0.041 | 0.450 |
| 8176273  | 71  | 0.041 | 0.443 |
| 8176278  | 72  | 0.411 | 0.087 |
| 8066171  | 73  | 0.109 | 0.053 |
| NA       | 74  | 0.005 | 0.004 |
| 8176289  | 75  | 0.029 | 0.465 |
| 8176293  | 76  | 0.025 | 0.010 |
| 4793192  | 77  | 0.028 | 0.467 |
| 8176296  | 78  | 0.028 | 0.465 |
| 3092988  | 79  | 0.040 | 0.448 |
| 8176303  | 80  | 0.025 | 0.017 |
| 8176305  | 81  | 0.040 | 0.090 |
| 8176307  | 82  | 0.051 | 0.021 |
| 8068463  | 83  | 0.103 | 0.042 |
| 8176313  | 84  | 0.009 | 0.010 |
| 8176316  | 85  | 0.017 | 0.007 |
| 8176318  | 86  | 0.043 | 0.433 |
| 12516    | 87  | 0.029 | 0.464 |
| 8176320  | 88  | 0.016 | 0.021 |
| 8176321  | 89  | 0.008 | 0.004 |
| 8176323  | 90  | 0.027 | 0.464 |
| 7223952  | 91  | 0.089 | 0.476 |
| 9911630  | 92  | 0.097 | 0.474 |
| 11460963 | 93  | 0.028 | 0.472 |
| 2298861  | 94  | 0.029 | 0.476 |
| 2298862  | 95  | 0.034 | 0.467 |
| 443759   | 96  | 0.051 | 0.338 |
| 11871636 | 97  | 0.022 | 0.347 |
| 2271539  | 98  | 0.122 | 0.456 |
| 690971   | 99  | 0.238 | 0.066 |
| 528854   | 100 | 0.259 | 0.186 |
| 323495   | 101 | 0.076 | 0.356 |
| 2593595  | 102 | 0.434 | 0.147 |
| 324075   | 103 | 0.336 | 0.310 |
| 2290041  | 104 | 0.213 | 0.106 |
| 4321242  | 105 | 0.095 | 0.494 |
| 752313   | 106 | 0.039 | 0.479 |
| 7359598  | 107 | 0.131 | 0.482 |
| 2271027  | 108 | 0.036 | 0.032 |
| 7214055  | 109 | 0.193 | 0.153 |
| 9766     | 110 | 0.037 | 0.490 |
| 1553469  | 111 | 0.073 | 0.104 |
| 2271029  | 112 | 0.052 | 0.497 |
| 3760384  | 113 | 0.036 | 0.476 |
| 2292749  | 114 | 0.055 | 0.372 |

<sup>a</sup>Het= Observed heterozygosity

<sup>b</sup>NA= Not Applicable - not in dbSNP
